# Supplementary material for: Rapid synthesis of oligosaccharides using an anomeric fluorous silyl protecting groupElectronic supplementary information (ESI) available: experimental data. See http://www.rsc.org/suppdata/cc/b3/b311448a/
Source: Royal Society of Chemistry journal article supplement (doi:10.1039/b311448a), 2003-01-01
Supplement: b311448a.doc [file b311448a.doc]

**Supporting Information**

1H- and 13C-NMR spectra were recorded in CDCl3 solution as indicated, at 200 (or 300, 400) and 50.3 MHz, respectively. The chemical shift values are given in ppm and the coupling constants in Hz. – MALDI spectra were recorded with the OMNIFLEX Bruker apparatus. – Thin-layer chromatography (TLC) was carried out using Merck precoated silica gel F-254 plates. Flash chromatography was carried out using Macherey-Nagel silica gel 60, 230-400 mesh. – Solvents were dried according to standard procedures, and reactions requiring anhydrous conditions were performed under nitrogen. Solutions containing the final products were dried with Na2SO4, filtered, and concentrated under reduced pressure using a rotary evaporator. – Elemental analyses were performed by the staff of the microanalytical laboratory in our department. – The FluoroFlash Columns have been purchased from Fluorous Technologies, Inc. – *tert*-butyl-phenyl-1*H*,1*H*,2*H*,2*H*-heptadecafluorodecyloxysilyl bromide was synthesized as described in ref. 6c.

All fluorous tagged compounds are isomeric mixtures because the silicon atom is a stereogenic center. Isomer ratios were not determined.

***tert*-Butyl-phenyl-1H,1H,2H,2H-heptadecafluorodecyloxysilyl 3,4,6-tri–O-acetyl-2-deoxy-2-acetyl--D-glucopyranoside 4**. *tert*-butyl-phenyl-1*H*,1*H*,2*H*,2*H*-heptadecafluoro-decyloxysilyl bromide (0.575 g, 0.816 mmol) was dissolved in CH2Cl2 (1.8 mL). **1** (0.142 g, 0.408 mmol), triethylamine (0.136 mL, 0.979 mmol), and dimethylaminopyridine (0.0050 g, 0.0408 mmol) were added and the mixture was stirred at rt overnight. CH2Cl2 was added and the mixture was washed with NaHCO3 solution. The organic phase was dried over Na2SO4, the solvent was removed under reduced pressure and the residue purified by flash chromatography (toluene/acetone 6:4) to afford 0.337 g (85%) of **4** as a white solid. – m.p. 155 °C – 1H NMR (mixture of diastereoisomers) (400 MHz, CDCl3):  0.98, 1.00 (2 s, 18 H, t-Bu), 1.90-2.20 (8 s, 24 H, CH3CO-), 2.45 (m, 4 H, -CH2C8F17), 3.50-4.20 (m, 12 H, H2, H5, H6, -CH2OSi-), 4.91 (d, 1 H, H1), 5.01-5.20 (m, 5 H, H1, H3, H4), 5.43 (m, 2 H, -NH), 7.35-7.70 (m, 10 H, aromatics). – 13C NMR (mixture of diastereoisomers) (100.6 MHz, HETCOR, CDCl3):  136.0, 132.0, 128.5, 97.5, 73.2, 69.5, 63.0, 57.0, 34.2, 25.0, 22.0, 21.0. – MS (MALDI-TOF): calcd. For C34H38F17NO10Si 971.20; found 972. – C34H38F17NO10Si (971.20): calcd. C 42.02, H 3.94, N 1.44; found C 42.00, H 3.92, N 1.42.

***tert*-Butyl-phenyl-1H,1H,2H,2H-heptadecafluorodecyloxysilyl 2-deoxy-2-acetyl--D-glucopyranoside 5**. Compound **4** (0.250 g, 0.257 mmol) was dissolved in dry MeOH (3 mL) and MeONa-MeOH (0.257 mL, 0.1 M) was added and the mixture was stirred for 30 min and then neutralized with Amberlite IR 120 H+ resin. The mixture was filtered and concentrated, and the residue was passed through fluorous silica gel in a two-stage extraction eluting first with 80% MeOH/H2O (to remove the eventually nontagged products) and then with MeOH (to remove the tagged products) to give 0.217 g (quant.) of **5** as a white solid. – m.p. 110 °C – 1H NMR (mixture of diastereoisomers) (400 MHz, CDCl3):  0.98, 1.00 (2 s, 18 H, t-Bu), 2.05 (2 s, 6 H, CH3CO-), 2.45 (m, 4 H, -CH2C8F17), 3.10-3.90 (m, 12 H, H2, H3, H4, H5, H6), 4.15 (m, 4 H, -CH2OSi-), 4.80, 4.91 (2 d, 2 H, H1), 6.80 (m, 2 H, -NH), 7.21-7.70 (m, 10 H, aromatics). – 13C NMR (mixture of diastereoisomers) (100.6 MHz, HETCOR, CDCl3):  136.5, 131.5, 129.0, 97.1, 77.0, 75.0, 71.2, 63.0, 59.8, 57.0, 56.0, 34.0, 26.0, 23.0. – MS (MALDI-TOF): calcd. For C28H32F17NO7Si 845.17; found 846. – C28H32F17NO7Si (845.17): calcd. C 39.77, H 3.81, N 1.66; found C 39.75, H 3.82, N 1.65.

***tert*-Butyl-phenyl-1H,1H,2H,2H-heptadecafluorodecyloxysilyl 4,6-O-benzylidine-2-deoxy-2-acetyl--D-glucopyranoside 6**. To a mixture of the compound **5** (0.055 g, 0.065 mmol) in dry CH3CN (1 mL), were added benzaldehyde dimethylacetal (0.015 mL, 0.098 mmol) and camphorsulfonic acid (0.0015 g, 0.0065 mmol). The mixture was stirred for 1 h at room temperature and neutralised with TEA. The solvent was evaporated under reduced pressure. The resulting residue was passed through fluorous silica gel in a two-stage extraction eluting first with 80% MeOH/H2O (to remove the eventually nontagged products) and then with MeOH (to remove the tagged products). The MeOH fraction was evaporated and the MALDI-TOF analysis showed the presence of a small quantity of non reacted starting materials. The mixture was submitted to a second cycle of reaction with the condition described above to give 0.045 g of **6** as a white solid (75% over two cycles). – m.p. 62 °C – 1H NMR (mixture of diastereoisomers) (400 MHz, CDCl3):  0.97, 1.00 (2 s, 18 H, t-Bu), 2.00 (2 s, 6 H, CH3CO-), 2.45 (m, 4 H, -CH2C8F17), 3.21 (m, 1 H, H4), 3.40 (m, 1 H, H4’), 3.52 (m, 2 H, H3, H3’), 3.60 (m, 2 H, H5, H5’), 3.82 (m, 2 H, H2, H2’), 4.08 (m, 4H, -CH2O-, H6, H6’), 4.21 (m, 4 H, -CH2O-, H6, H6’), 4.88 (d, 1 H, J = 7.1 Hz, H1), 5.02 (d, 1 H, J = 7.2 Hz, H1’), 5.40, 5.41 (2 s, 2 H, -CHPh), 6.30 (d, 1 H, J = 7.6 Hz, -NH’), 6.41 (d, 1 H, J = 7.4 Hz, -NH), 7.20-7.8 (m, 20 H, aromatics). – 13C NMR (mixture of diastereoisomers) (100.6 MHz, HETCOR, CDCl3):  137.6, 135.5, 135.3, 131.1, 129.5, 128.6, 128.3, 128.2, 126.8, 102.13, 96.5, 96.1, 81.8, 71.6, 71.4, 68.6, 66.9, 66.7, 59.7, 59.6, 56.5, 34.5, 34.3, 34.1, 26.0, 23.7, 19.1, 18.9. – MS (MALDI-TOF): calcd. For C35H36F17NO7Si 933.20; found 934. – C35H36F17NO7Si (933.20): calcd. C 45.02, H 3.89, N 1.50; found C 45.00, H 3.87, N 1.49.

***tert*-Butyl-phenyl-1H,1H,2H,2H-heptadecafluorodecyloxysilyl 4,6-O-benzylidine-2-deoxy-2-acetyl-3-O-[2,3,4,6-tetra-O-acetyl--D-galactopyranosyl]--D-glucopyranoside 8**. TMSOTf (0.143 mL, 0.0143 mmol) was added to a solution of **6** (0.134 g, 0.143 mmol) and **7** (0.206 g, 0.429 mmol) in dry CH2Cl2 (1 mL) under dry Argon at –20°C. The mixture was stirred for 15 min, neutralized with TEA, and concentrated in vacuo. The residue was passed through fluorous silica gel in a two-stage extraction eluting first with 80% MeOH/H2O (to remove the nontagged products) and then with MeOH (to remove the tagged products). The MeOH fraction was evaporated and the MALDI-TOF analysis showed the presence of a small quantity of non reacted starting materials. The mixture was submitted to a second cycle of reaction with the condition described above to give 0.141 g of **8** as a white solid (78% over two cycles). – m.p. 78 °C – 1H NMR (mixture of diastereoisomers) (400 MHz, CDCl3):  0.96, 0.98 (2 s, 18 H, t-Bu), 1.90-2.18 (4 s, 30 H, CH3CO-), 2.46 (m, 4 H, -CH2C8F17), 3.21 (m, 2 H, H2a, H2’a), 3.60-4.30 (m, 14 H, H4a, H4a’, H6a, H6a’, H6’a, H6’a’, H5a, H5a’, H5b, H5b’, H6b, H6b’, H6’b, H6’b’), 4.50-5.90 [m, 14 H, H,H-COSY: 4.60, 4.62 (2 dd, 2 H, J = 9.3 Hz, J = 9.3 Hz, H3a, H3a’), 4.76, 4.78 (2 d, 2 H, H1b, J = 8.0 Hz, H1b’, J = 8.0 Hz), 4.94 (m, 2 H, H3b, H3b’), 5.17 (m, 2 H, H2b, H2b’), 5.31 (m, 2 H, H4b, H4b’), 5.49 (2 s, 2 H, -CHPh, -CH’Ph), 5.52, 5.60 (2 d, 2 H, H1a, J = 8.2 Hz, H1a’, J = 7.8 Hz), 5.76, 5.78 (2 d, 2 H, -NH, J = 7.5 Hz, -NH’, J = 7.5 Hz)], 7.30-7.70 (m, 20 H, aromatics). – 13C NMR (mixture of diastereoisomers) (100.6 MHz, HETCOR, CDCl3):  135.4, 131.3, 129.6, 128.5, 126.8, 102.2, 100.7, 94.2, 81.4, 76.9, 71.4, 70.9, 69.8, 68.9, 68.8, 67.3, 61.4, 60.8, 56.8, 26.1, 23.9, 21.2, 21.1, 20.9. – MS (MALDI-TOF): calcd. For C49H54F17NO16Si 1263.29; found 1264. – C49H54F17NO16Si (1263.29): calcd. C 46.56, H 4.31, N 1.11; found C 46.59, H 4.31, N 1.11.

**4,6-O-benzylidine-2-deoxy-2-acetyl-3-O-[2,3,4,6-tetra-O-acetyl--D-galactopyranosyl]-,-D-glucopyranoside Compound 9**. To a solution of **8** (0.0173 g, 0.0137 mmol) in THF, at 0°C, was added a solution of TBAF in THF (1 M, 0.0164 mmol, 0.0164 mL). The solution was stirred for 5 min., then brine (1 mL) was added and the acqueous phase was extracted with EtOAc. The combined organic phases were dried with Na2SO4, filtered, and concentered under reduced pressure. The residue was passed through fluorous silica gel eluting with MeOH/H2O 80% to obtain the non tagged product. The MeOH/H2O was evaporated to give 5.5 mg of **9** (62%) as a white solid. The MALDI-TOF analysis showed the presence of the only non tagged product **9**. – m.p. 104 °C – 1H NMR (mixture of epimers) (400 MHz, CDCl3):  1.95-2.15 (4 s, 15 H, CH3CO-), 3.50-6.00 [m, 17 H, H,H-COSY: 3.60-3.90 (m, 3 H, H5b, H4a, H6’a), 4.02 (m, 2 H, H6b, H3a), 4.05-4.28 (m, 4 H, H2a, H5a, H6’b, OH), 4.28, 4.40 (2 dd, 1 H, H6a, J = 4.9 Hz, J = 10.2 Hz, H6a’,J = 5.6 Hz, J = 10.8 Hz), 4.78, 4.90 (2d, 1 H, J = 7.9 Hz, J = 7.7 Hz, H1b), 4.97, 4.99 (2 dd, 1 H, J = 3.4 Hz, J = 10.4 Hz, H3b), 5.18, 5.20 (2 dd, 1 H, J = 7.9 Hz, J = 10.4 Hz, H2b), 5.33 (m, 1 H, H4b), 5.38 (m, 1 H, H1a), 5.59 (s, 1 H, -CHPh), 5.83 (d, 1 H, J = 7.2 Hz, -NH)], 7.32-7.60 (m, 20 H, aromatics). – 13C NMR (mixture of diastereoisomers) (100.6 MHz, HETCOR, CDCl3):  129.4, 126.4, 101.9, 101.1, 93.0, 81.3, 81.1, 71.4, 71.1, 70.3, 69.3, 67.2, 61.5, 54.4, 23.7, 23.4, 21.3, 21.1, 21.0 – MS (MALDI-TOF): calcd. For C29H37NO15 639.22; found 662 (M + Na). – C29H37NO15 (639.22): calcd. C 54.46, H 5.83, N 2.19; found C 54.50, H 5.83, N 2.19.
